# Supplementary material for: Fabrication of bismuth oxide-modified pencil graphite sensors for monitoring the hazardous herbicide diuron
Source: Royal Society of Chemistry journal article supplement (doi:10.1039/d0na00394h), 2020-01-01
Supplement: d0na00394h1.pdf [file d0na00394h1.pdf]

## Supplementary Material

### Bismuth Oxide Fabricated Pencil Graphite Sensor for Monitoring Hazardous Herbicide Diuron

Annu<sup>a\*</sup>, Antony Nitin Raja<sup>a</sup>, Kshiti Singh<sup>b</sup>, Anand K Halve, Rajeev Jain<sup>b</sup>

<sup>a</sup>School of Studies in Environmental Chemistry, Jiwaji University, Gwalior-474011, India

<sup>b</sup>School of Studies in Chemistry, Jiwaji University, Gwalior-474011, India

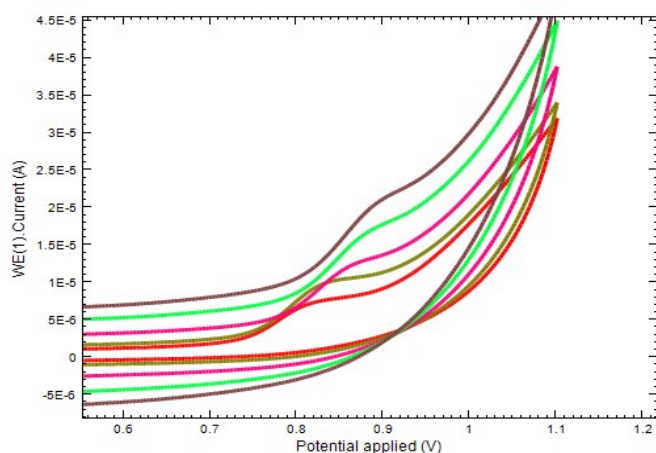

[a]

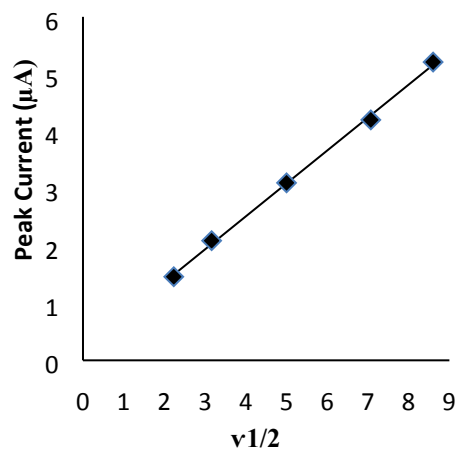

[b]

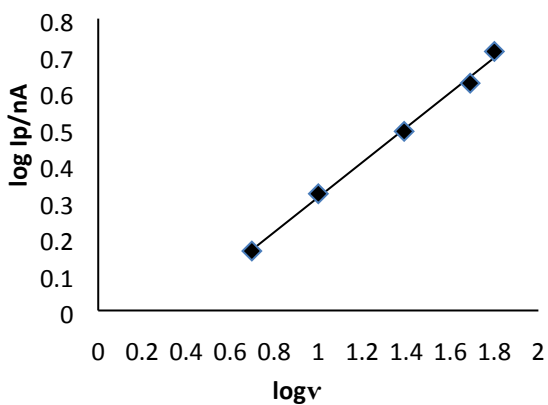

[c]

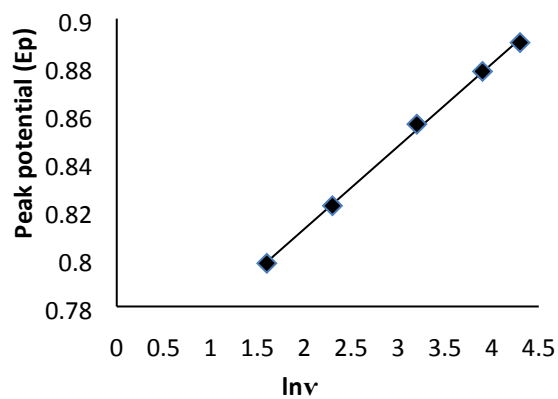

[d]

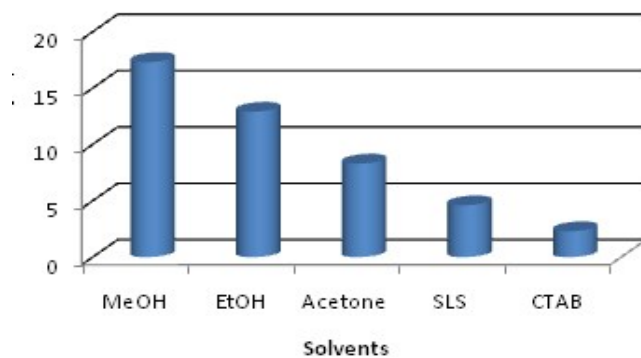

[e]

**Fig. 1ESI (a) Cyclic Voltammograms at different scan rate (10-100 mV s<sup>-1</sup>) (b) Plot of square root of scan rate vs current (c) plot of log  $v$  vs. log  $I_p$  current (d) plot of  $E_p$  vs.  $\ln v$  (e) Different solvents vs current**

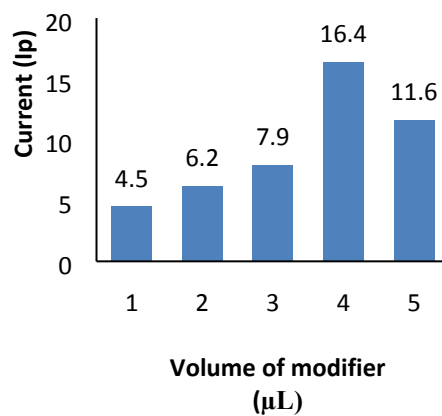

**Fig.2ESI Volume of modifier vs current**
